## ■ LABORATORY INVESTIGATIONS

Anesthesiology  
78:72-82, 1993  
© 1993 American Society of Anesthesiologists, Inc.  
J. B. Lippincott Company, Philadelphia

# Halothane Decreases the Rate of Production of Cerebrospinal Fluid

## Possible Role of Vasopressin $V_1$ Receptors

Mazen A. Maktabi, M.D.,\* F. F. Elbokl, M.D.,† F. M. Faraci, Ph.D.,‡ M. M. Todd, M.D.§

**Background:** Circulating vasoactive hormones (e.g., vasopressin) play an important role in the regulation of blood flow to the choroid plexus and the rate of cerebrospinal fluid (CSF) production. We tested the hypothesis that halothane decreases CSF production through a vasopressin-related mechanism and examined the related changes in blood flow to the choroid plexus.

**Methods:** Using ventriculocisternal perfusion, CSF production was measured in chloralose anesthetized, normothermic rabbits whose lungs were mechanically ventilated. Rabbits received either 0.5 minimum alveolar concentration (MAC; end-tidal) of halothane (added to a preestablished chloralose anesthetic), 0.5 MAC of halothane in the presence of a vasopressin  $V_1$  antagonist (iv), or the  $V_1$  antagonist alone. In addition, we examined animals in which no intervention was made (time control) and animals subjected to a 25% decrease in mean blood pressure produced by hemorrhage, with and without the  $V_1$  antagonist. In a separate series of rabbits, regional and total blood flows to the brain and the choroid plexus were measured using radioactive microspheres. These studies were carried out under similar conditions, except that the effects of end-tidal 0.25, 0.5, and 1 MAC of halothane were examined in each rabbit (each added to a preestablished chloralose anesthetic).

**Results:** Under control conditions, blood flow to the choroid plexus averaged  $351 \pm 198 \text{ ml} \cdot \text{min}^{-1} \cdot 100 \text{ g}^{-1}$  (mean  $\pm$  SD) and CSF production averaged  $10.1 \pm 1.9 \mu\text{l} \cdot \text{min}^{-1}$ . Halothane (0.25, 0.5, and 1 MAC) did not alter choroid plexus blood flow but decreased CSF production by  $28 \pm 6\%$  at 0.5 MAC ( $P < .05$ ). In contrast, 1 MAC of halothane increased total blood flow to

the brain by  $20 \pm 25\%$  ( $P < .05$ ). The  $V_1$  antagonist, which did not affect production of CSF when given alone, prevented the decrease in CSF production in response to halothane. Hemorrhage decreased blood flow to the choroid plexus but not to the brain, and the  $V_1$  antagonist attenuated the decrease in the rate of CSF production by hemorrhage ( $34 \pm 11\%$  vs.  $48 \pm 18\%$ ,  $P < .05$ ).

**Conclusions:** Halothane decreases CSF production with no net change in the blood flow to the choroid plexus. Decrease in CSF production appears to be mediated through a vasopressin-related mechanism and not to the blood pressure decrease seen during halothane anesthesia. (Key words: Anesthetics, volatile: halothane. Brain, choroid plexus: brain blood flow; cerebrospinal fluid. Hormones: vasopressin;  $V_1$  antagonist. Measurement techniques: microspheres; rabbit.)

THE choroid plexus is the major site of production of cerebrospinal fluid (CSF).<sup>1</sup> Unlike most blood vessels of the brain, in which a blood-brain barrier exists, vessels of the choroid plexus do not have tight junctions between endothelial cells.<sup>2,3</sup> As a result, the vascular muscle and interstitium of the choroid plexus are relatively accessible to blood-borne stimuli. Therefore it is not surprising that humoral mechanisms play a role in the regulation of blood flow to the choroid plexus and in the production of CSF. For example, our recent studies suggest that norepinephrine,<sup>4</sup> vasopressin,<sup>5,6</sup> and both angiotensin I and angiotensin II<sup>7,8</sup> selectively decrease the blood flow to the choroid plexus, without decreasing cerebral blood flow. Furthermore, vasopressin decreases the production of CSF through a vasopressin ( $V_1$ ) receptor mechanism.<sup>6</sup>

Volatile anesthetics have profound and variable effects on the rate of production of CSF.<sup>9,10</sup> For example, halothane decreases the rate of production of CSF by approximately 30%.<sup>9</sup> The mechanisms that account for this effect have not been evaluated. However, halothane increases the levels of vasopressin in the CSF and the circulation.<sup>11</sup> Since the choroid plexus has a high density of  $V_1$  receptors,<sup>12,13</sup> it is possible that halothane is acting through a vasopressin-related mechanism. Therefore, the first goal of the present study was to test

\* Assistant Professor of Anesthesia.

† Fellow, Department of Anesthesia.

‡ Assistant Professor of Internal Medicine and Pharmacology.

§ Professor of Anesthesia.

Received from the Departments of Anesthesia, Internal Medicine, and Pharmacology, Neuroanesthesia Research Group, University of Iowa College of Medicine, Iowa City, Iowa. Accepted for publication August 14, 1992. Supported by a Starter Grant from the American Society of Anesthesiologists to Dr. Maktabi.

Address reprint requests to Dr. Maktabi: Department of Anesthesia, University of Iowa College of Medicine, 200 Hawkins Drive, Iowa City, Iowa 52242-1079.

## CHOROID PLEXUS AND HALOTHANE

the hypothesis that the effects of halothane on the rate of production of CSF are mediated through  $V_1$  receptors. Since the blood flow to the choroid plexus may be an important determinant of the production of CSF, the second goal was to examine the influence of halothane on blood flow to the choroid plexus.

### Methods

#### *Preparation of Animals*

The experimental protocol for this study was approved by the Animal Care and Use Committee of the authors' institution. Eighty-four New Zealand white rabbits (2–3.4 kg) were anesthetized with sodium thiopental, given *via* an ear vein catheter (25–30 mg/kg *iv* followed by intermittent boluses of 0.8–1.0 mg/kg). After infiltration with 0.5% bupivacaine, a tracheostomy was performed. The administration of sodium thiopental was stopped and chloralose was given intravenously (30–40 mg/kg followed by 10–20 mg hourly throughout the duration of the experiment). One dose of gallamine triethiodide (5 mg/kg *iv*) was administered after induction, but no further relaxant was given for the remainder of the experiment. Throughout each experiment, adequate depth of anesthesia was assessed by noting the response to periodic pressure on the tail. Additional chloralose (10–20 mg *iv*) was administered if movement or a change in blood pressure occurred. The animals' lungs were mechanically ventilated with air and supplemental oxygen ( $FI_{O_2} \sim 0.5$ ) to maintain a  $Pa_{CO_2} \sim 35$ –45 mmHg and  $Pa_{O_2}$  above 100 mmHg. Ventilation and  $FI_{O_2}$  adjustments were based on measurements of arterial blood gases. A catheter was inserted into a femoral artery (again after infiltration with bupivacaine) to monitor blood pressure and to sample arterial blood, and another catheter was inserted in a femoral vein for administration of fluids and drugs. Arterial blood gases were monitored two or three times during the surgical preparation and once before each measurement of blood flow. The partial pressures of inspired oxygen, end-tidal carbon

dioxide, and end-tidal halothane also were monitored constantly during the studies (Datex 254 Airway Gas Monitor, Puritan Bennett). Rectal temperature was monitored and maintained at 37–38° C with a heating pad. Lactated Ringer's solution was infused at 7–10 ml  $\cdot$  kg<sup>-1</sup>  $\cdot$  h<sup>-1</sup> to maintain hydration.

#### *Rate of Production of CSF*

To measure the rate of CSF production, we used the ventriculocisternal perfusion method.<sup>6,14,15</sup> After placement of arterial and venous catheters, the animal was placed in a stereotactic head-holder and a 25-G needle was placed stereotactically into one lateral ventricle. The location of the lateral ventricle was confirmed during the insertion of the needle when the pressure, measured through a side port, abruptly decreased and an appropriate CSF pressure wave pattern was identified (CSF pressure tracing is identified by the characteristic change in amplitude with ventilation and heartbeats). After exposure of the atlanto-occipital membrane, the tip of a 19-G "butterfly" needle was placed in the cisterna magna and the plastic hub of the catheter was adjusted to the level of the auditory meatus. To prevent leakage around the cisternal needle, Super Glue<sup>®</sup> was applied around the insertion site. Artificial CSF<sup>||</sup> was infused into the lateral ventricle at 30  $\mu$ l/min using a glass gas-tight syringe while infusion pressure was measured through a side port. The perfusate contained 1 mg/ml of the nondiffusible indicator blue dextran (molecular weight =  $2 \times 10^6$ , Sigma). Success of ventriculocisternal perfusion was subsequently confirmed by the appearance of the blue dye and the absence of blood in the effluent that drained through the cisternal catheters. The effluent was collected continuously and divided into aliquots at 15-min intervals. If obstruction of the cisternal needle occurred, as evidenced by a gradual increase in CSF pressure and a pattern of decreased volume of the collected perfusate, the experiment was discontinued ( $n = 4$ ). If leak of perfusate was noted around the cisternal needle (which was evidenced also by a decrease in the measured CSF pressure and a decrease in collection of cisternal perfusate), the experiment was discontinued ( $n = 5$ ). The concentration of blue dextran in the infusate and effluent was measured with a spectrophotometer (wave length 610 nm) and the rate of production of CSF in  $\mu$ l/min was calculated from the dilution of blue dextran with the formula:  $V_f = V_i(C_i - C_o)/C_o$ , where  $V_f$  is the rate of production of CSF,  $V_i$  is the rate of infusion of perfusate, and  $C_i$  and  $C_o$  are

|| The artificial cerebrospinal fluid (CSF) consisted of 0.44 g KCl, 0.26 g  $MgCl_2 \cdot 6H_2O$ , 0.50 g  $CaCl_2 \cdot 2H_2O$ , 1.33 g dextrose, 15.42 g NaCl, dissolved in 2 L of deionized water. Sodium bicarbonate (50 mEq) was then added to 50 ml of the solution, which was then bubbled with a 5% carbon dioxide in nitrogen gas mixture to produce normal values for pH,  $P_{CO_2}$ , and  $P_{O_2}$ .<sup>16</sup> The pH,  $P_{CO_2}$ , and  $P_{O_2}$  of artificial CSF averaged  $7.27 \pm 0.03$ ,  $43 \pm 3$  mmHg,  $62 \pm 15$  mmHg, respectively.

the concentration of blue dextran in the inflow and outflow fluids, respectively.

#### *Experimental Protocol of Studies of Production of CSF*

In all CSF study animals, ventriculocisternal perfusion was performed for 4 h. The first 2 h provided adequate time for equilibration of the tracer to be reached. A timer was then reset to zero. If a stable value for the rate of production of CSF was not reached during the first 2 h of ventriculocisternal perfusion, the results of the experiment were discarded. In all groups, the cisternal outflow aliquots collected between 0 and 15 min and between 15 and 30 min after the end of the equilibration period were used to determine the first and second control measurements of CSF production. After the second control measurement, the agent (or intervention) to be tested was administered and ventriculocisternal perfusion continued for another 90 min. Cisternal perfusate collected at 60, 75, and 90 min following the start of each intervention were used to determine the effects of that intervention on the rate of CSF production.

Individual rabbits were assigned to one of six experimental groups:

In group 1 ( $n = 8$ ), after two control measurements, halothane was added to the inspired gas mixture to achieve an end-tidal concentration of 0.5 minimum alveolar concentration (MAC). This concentration of halothane was maintained for 90 min to the end of the experiment (1 MAC of halothane for the rabbit is 1.4%).<sup>17</sup> The administration of chloralose continued as noted above.

In group 2 ( $n = 8$ ), after the first control measurement, the vasopressin  $V_1$  antagonist [1-( $\beta$ -mercapto- $\beta$ , $\beta$ -cyclopentamethylenepropionic acid), 2-(O-methyl) tyrosine] arginine vasopressin (10  $\mu$ g/kg, Peninsula Laboratories, Belmont, CA) was given, CSF production was measured again to establish a second control, then halothane was added to achieve an end-tidal concentration of 0.5 MAC as in the first group. The goal with this group was to test whether the effects of halothane on CSF production were mediated through stimulation of vasopressin  $V_1$  receptors. Again, halothane was administered in the presence of chloralose anesthesia as described above.

In group 3 ( $n = 4$ ), after the two control measurements, the  $V_1$  antagonist (10  $\mu$ g/kg) was given and the measurement of CSF production followed for 90 min. The purpose with this group was to rule out the pos-

sibility that the  $V_1$  antagonist, by itself, affected CSF production.

In group 4 ( $n = 12$ ), after the two control measurements, a 25% decrease in mean blood pressure from control values was produced by hemorrhage. This group was studied to rule out the possibility that any effect of halothane on rate of production of CSF was due to a decrease in blood pressure.

In group 5 ( $n = 9$ ), a 25% decrease in mean blood pressure from control values was produced by hemorrhage in the presence of the  $V_1$  antagonist.

Finally, in group 6 ( $n = 8$ ), no intervention was made in the chloralose anesthetized animals. These animals served as time controls to verify the stability of CSF production measurements during the experimental time period.

We examined the effect of 0.5 MAC of halothane and 25% decrease of mean pressure on rate of CSF production because they are values at the middle of the dose-response relationship for effect of halothane and hemorrhagic hypotension on the blood flow to the choroid plexus (see below).

#### *Blood Flow Studies*

Animals used for blood flow studies were anesthetized and prepared as noted above, except that needles were not inserted in the lateral ventricle or cisterna magna. Instead, a pigtail polyethylene catheter was inserted into a femoral artery and advanced *via* the aorta into the left ventricle for injection of microspheres. Catheters also were inserted into both brachial arteries to withdraw reference blood samples during injection of microspheres. Blood flow was measured (see below) using, at random, one of 15- $\mu$ m microspheres labelled with  $^{46}\text{Sc}$ ,  $^{95}\text{Nb}$ ,  $^{153}\text{Gd}$ ,  $^{85}\text{Sr}$ ,  $^{113}\text{Sn}$ , or  $^{141}\text{Ce}$  (New England Nuclear, Boston, MA). Microspheres ( $0.5\text{--}1.3 \times 10^6$ ) were injected through the left ventricular catheter over 10 s. Reference blood samples were withdrawn at a rate of 0.5 ml/min from each brachial artery, using a Harvard pump, started 15 s before injection of microspheres and continuing for 1 min after the injection.

At the end of each experiment, the anesthetized animal was killed with intravenous KCl. The brain was removed, fixed in formalin, and later dissected into regional samples. The choroid plexuses from the lateral, third, and fourth ventricles were removed, weighed, and placed together in a separate plastic tube. Other regions of the brain that were counted included the caudate nucleus, thalamus, midbrain, pons, me-

## CHOROID PLEXUS AND HALOTHANE

dulla, and cerebellum. The remaining cortex was divided into six parts, each of which was weighed and put into a separate tube. Radioactivity of tissue samples and reference arterial blood samples was determined using a NaI well-type gamma counter. Isotope separation was performed using standard techniques. Blood flow (BF) was calculated from the formula:  $BF = CT \times 100 \times QR/CR$ , where QR is the reference sample withdrawal rate and CT and CR are counts in tissue and reference blood samples, respectively. The counts of the two reference blood samples were averaged.

### *Experimental Protocol of Blood Flow Studies*

Four groups of animals were studied:

In group 1 ( $n = 9$ ), we tested whether halothane affects blood vessels of the brain and the choroid plexus differentially. Blood flow was measured five times: twice under control conditions (20 min apart), and then during the administration of end-tidal 0.25, 0.5, and 1 MAC of halothane in an ascending fashion. At each stage, flow was measured at the end of a 20-min period of stable halothane concentration. No effort was made to support the blood pressure (see Discussion).

In group 2 ( $n = 7$ ), we examined whether the response of choroid plexus blood flow to halothane is mediated by a vasopressin  $V_1$  receptor mechanism. We measured blood flow five times as described in the first group with the following exception: between the two control measurements, the vasopressin  $V_1$  antagonist (10  $\mu$ g/kg) was given intravenously over 3 min.

In group 3 ( $n = 8$ ), we decreased blood pressure by withdrawal of blood. Blood flow was measured five times: twice under control conditions, then after mean blood pressure had been reduced by 10%, 25%, and 50% of control values in a descending fashion (each for 20 min) by hemorrhage. Animals of this group were anesthetized with chloralose only. The goal with this group was to rule out the possibility that effects of halothane on blood flow to the choroid plexus were simply due to a decrease in blood pressure.

In group 4 ( $n = 11$ ), blood flow was measured during the administration of anesthesia with chloralose as described in the surgical preparation of animals. The measurements of blood flow were made at intervals of approximately 20 min. This group served as a time control for studies of halothane.

In all groups, before each blood flow measurement (approximately every 20 min), depth of anesthesia was checked as described above and chloralose (10–20 mg)

was administered if needed. In all animals, the order of injection of isotope-labelled microspheres was randomized.

In four rabbits in each of groups 1, 3, and 4, plasma levels of vasopressin were measured by radioimmunoassay as described previously.<sup>18</sup> In group 1, the first blood sample was taken between measurements of control blood flow. The two subsequent blood samples were taken 20 min after the administration of 0.5 and 1 MAC of halothane, immediately before the respective measurements of blood flow. In group 3, the first blood sample was taken between measurements of control blood flow. The two subsequent blood samples were taken 20 min after decreasing the blood pressure by 25% and 50% from control values, immediately before the respective measurements of blood flow. In group 4, the first blood sample was taken between measurements of control blood flows. The two subsequent blood samples were taken immediately before the last two measurements of blood flow, respectively. To maximize the detection of vasopressin in the plasma by radioimmunoassay, the required volume of each blood sample was 5 ml.

### *Statistics*

**CSF Studies.** Statistical analysis of the rates of CSF of production was performed using two-way analysis of variance (ANOVA) to compare CSF production at 90 min after the intervention to the second control observation. The experimental groups were treated as a "between-group" factor and measurement interval treated as a "within-group" factor. Pair-wise comparison between groups was performed with Student-Newman-Keul's test.  $P < .05$  was considered significant. Repeated measures ANOVA followed, when indicated, by Newman-Keul's test was performed to compare values at 60, 75, and 90 min after interventions to each other and to the control observations.

**Blood Flow.** Statistical analysis of the blood flow studies was performed using repeated measures ANOVA. When indicated, it was followed by Dunnett's  $t$  test to compare values during interventions to the second control.

**Plasma Levels of Vasopressin.** Statistical analysis of the plasma levels of vasopressin was performed using two-way ANOVA. Repeated measures ANOVA also was performed. When indicated, this was followed by Dunnett's  $t$  test to compare values during control and intervention.

## Results

### Production of CSF

Under control conditions, the rate of production of CSF was similar in all groups, averaging  $10.1 \pm 1.9 \mu\text{l}/\text{min}$  (mean  $\pm$  SD; fig. 1, table 1). There was no significant difference between the two control observations in any experimental group. Administration 0.5 MAC of halothane decreased the production of CSF by  $28 \pm 6\%$  at the 90-min observation point ( $P < .05$ ). The  $V_1$  antagonist prevented the decrease in CSF production

by halothane, but the  $V_1$  antagonist, by itself, did not affect production of CSF. Cerebrospinal fluid production was stable throughout the experiment in the time control animals.

Hemorrhagic hypotension decreased the rate of production of CSF by  $48 \pm 18\%$  ( $P < .05$ ) at the 90-min observation point. In the presence of the  $V_1$  antagonist, hemorrhagic hypotension decreased production of CSF by  $34 \pm 11\%$  ( $P < .05$ ) at the 90-min observation point. This was significantly less than the value obtained with hemorrhage alone ( $P < .05$ ).

Within each of the groups there was no significant difference between the rates of CSF production at 60, 75, and 90 min after the intervention(s), indicating that equilibrium had been achieved.

### Blood Flow

Under control conditions, blood flow to the choroid plexus was much greater than total blood flow to the brain (the whole brain and brain stem, excluding the choroid plexus; tables 2–4). Halothane (1 MAC) increased total blood flow to the brain by  $20 \pm 25\%$  ( $P < .05$ ; table 2). Halothane also increased regional blood flows to the caudate nucleus, midbrain, pons, medulla, and cerebellum. In contrast, halothane did not affect the blood flow to the choroid plexus (table 2). The effect of halothane on the blood flow to the choroid plexus and the brain was not altered in the presence of the  $V_1$  antagonist (table 3). Hemorrhagic hypotension did not affect total blood flow to the brain, but it did decrease the blood flow to the choroid plexus (table 4). In time control animals, blood flow to the choroid plexus and to the brain were  $442 \pm 123$  and  $58 \pm 12 \text{ ml} \cdot \text{min}^{-1} \cdot 100 \text{ g}^{-1}$ , respectively, and did not change significantly throughout the experiment.

### Plasma Levels of Vasopressin

Before the administration of halothane, plasma levels of vasopressin were  $25 \pm 33 \text{ pg/ml}$  (mean  $\pm$  SD). During administration of 0.5 and 1 MAC halothane, plasma vasopressin levels significantly increased to  $109 \pm 72$  and  $150 \pm 94 \text{ pg/ml}$ , respectively ( $P < .05$ ). In group 3, prior to hemorrhage, plasma levels of vasopressin were  $24 \pm 26 \text{ pg/ml}$ . When blood pressure was decreased by hemorrhage, plasma vasopressin levels were  $108 \pm 84 \text{ pg/ml}$  ( $P > .05$ ) when blood pressure decreased by 25% of control values and significantly increased to  $495 \pm 468 \text{ pg/ml}$  when blood pressure decreased by 50% of control values ( $P < .05$ ). In animals that received no intervention (time control),

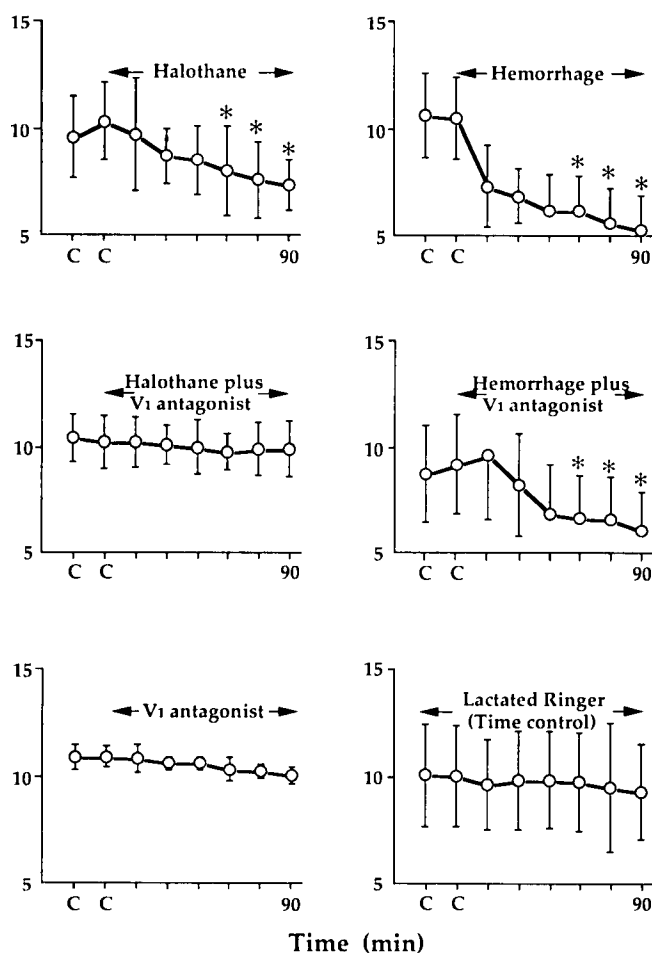

Fig. 1. Rate of formation of cerebrospinal fluid during administration of 0.5 MAC halothane ( $n = 8$ , top left), halothane in the presence of  $V_1$  antagonist ( $n = 8$ , middle left),  $V_1$  antagonist ( $n = 4$ , bottom left), hemorrhagic hypotension in the presence of  $V_1$  antagonist ( $n = 9$ , middle right), time control ( $n = 8$ , bottom right). Each letter C on the x axis of the graphs refers to a control observation. In each group, there was no difference between the two control observations. \*Significantly different from each of the controls. Values are mean  $\pm$  SD.

## CHOROID PLEXUS AND HALOTHANE

Table 1. Effects of the Various Interventions on Rate of Formation of Cerebrospinal Fluid

| Group                                                   | Control     | 90 min       | Significance versus Other Groups            |
|---------------------------------------------------------|-------------|--------------|---------------------------------------------|
| Group 1. Halothane (n = 8)                              |             |              |                                             |
| V <sub>I</sub> (μl · min <sup>-1</sup> )                | 10.30 ± 1.8 | 7.40 ± 1.2*  | <i>P</i> < .05 vs. groups 2, 3, 4, 5, and 6 |
| Mean blood pressure (mmHg)                              | 93 ± 11     | 69 ± 6*      |                                             |
| pH                                                      | 7.38 ± 0.03 | 7.35 ± 0.03  |                                             |
| P <sub>CO<sub>2</sub></sub> (mmHg)                      | 39 ± 4      | 39 ± 2       |                                             |
| P <sub>O<sub>2</sub></sub> (mmHg)                       | 239 ± 17    | 253 ± 22     |                                             |
| Group 2. Halothane + V <sub>1</sub> antagonist (n = 8)  |             |              |                                             |
| V <sub>I</sub> (μl · min <sup>-1</sup> )                | 10.20 ± 1.3 | 9.90 ± 1.3   | <i>P</i> > .05 vs. groups 3 and 6           |
| Mean blood pressure (mmHg)                              | 84 ± 10     | 69 ± 7*      |                                             |
| pH                                                      | 7.40 ± 0.04 | 7.36 ± 0.04  |                                             |
| P <sub>CO<sub>2</sub></sub> (mmHg)                      | 38 ± 3      | 38 ± 2       |                                             |
| P <sub>O<sub>2</sub></sub> (mmHg)                       | 247 ± 42    | 243 ± 22     |                                             |
| Group 3. V <sub>1</sub> antagonist (n = 4)              |             |              |                                             |
| V <sub>I</sub> (μl · min <sup>-1</sup> )                | 10.90 ± 0.5 | 10.03 ± 0.4  | <i>P</i> > .05 vs. groups 2 and 6           |
| Mean blood pressure (mmHg)                              | 94 ± 12     | 85 ± 10*     |                                             |
| pH                                                      | 7.37 ± 0.04 | 7.37 ± 0.01  |                                             |
| P <sub>CO<sub>2</sub></sub> (mmHg)                      | 39 ± 3      | 38 ± 2       |                                             |
| P <sub>O<sub>2</sub></sub> (mmHg)                       | 248 ± 18    | 237 ± 27     |                                             |
| Group 4. Hemorrhage (n = 12)                            |             |              |                                             |
| V <sub>I</sub> (μl · min <sup>-1</sup> )                | 10.5 ± 1.9  | 5.3 ± 1.6*   | <i>P</i> < .05 vs. groups 1, 2, 3, 5, and 6 |
| Mean blood pressure (mmHg)                              | 92 ± 12     | 69 ± 6*      |                                             |
| pH                                                      | 7.51 ± 0.04 | 7.29 ± 0.04* |                                             |
| P <sub>CO<sub>2</sub></sub> (mmHg)                      | 39 ± 1      | 39 ± 2       |                                             |
| P <sub>O<sub>2</sub></sub> (mmHg)                       | 265 ± 30    | 255 ± 23     |                                             |
| Group 5. Hemorrhage + V <sub>1</sub> antagonist (n = 9) |             |              |                                             |
| V <sub>I</sub> (μl · min <sup>-1</sup> )                | 9.19 ± 2.3  | 6.05 ± 1.8*  | <i>P</i> < .05 vs. groups 1, 2, 3, 4, and 6 |
| Mean blood pressure (mmHg)                              | 89 ± 9      | 68 ± 9*      |                                             |
| pH                                                      | 7.40 ± 0.03 | 7.32 ± 0.02* |                                             |
| P <sub>CO<sub>2</sub></sub> (mmHg)                      | 36 ± 4      | 38 ± 4       |                                             |
| P <sub>O<sub>2</sub></sub> (mmHg)                       | 236 ± 28    | 231 ± 29     |                                             |
| Group 6. Time control (n = 8)                           |             |              |                                             |
| V <sub>I</sub> (μl · min <sup>-1</sup> )                | 10.04 ± 2.4 | 9.31 ± 2.2   | <i>P</i> > .05 vs. groups 2 and 3           |
| Mean blood pressure (mmHg)                              | 88 ± 12     | 80 ± 10*     |                                             |
| pH                                                      | 7.42 ± 0.03 | 7.42 ± 0.05  |                                             |
| P <sub>CO<sub>2</sub></sub> (mmHg)                      | 36 ± 3      | 38 ± 3       |                                             |
| P <sub>O<sub>2</sub></sub> (mmHg)                       | 329 ± 66    | 306 ± 57     |                                             |

Values are mean ± SD.

\* Significantly different from own control at 90 min after intervention at *P* < .05. Between-group comparisons of cerebrospinal fluid production are under significance versus other groups column.

plasma levels of vasopressin were  $8 \pm 3$ ,  $10 \pm 5$ , and  $12 \pm 5$  pg/ml, respectively (*P* > .05). The control values of plasma vasopressin did not differ significantly among the three groups (*P* > .05).

## Discussion

The principal finding of this study is that halothane decreases the rate of CSF production *via* a vasopressin-related mechanism. This effect is not related to choroid plexus blood flow or to any blood pressure decrease during the administration of halothane.

Halothane has been shown to decrease the rate of CSF

production.<sup>9</sup> Circulating vasopressin also decreases CSF production.<sup>6</sup> Since halothane increases both plasma and CSF levels of vasopressin,<sup>11</sup> we anticipated that halothane may decrease the production of CSF *via* a vasopressin-related mechanism. However, before discussing our findings, we will comment on the methods we used to measure CSF production and blood flow to the choroid plexus.

## Consideration of Methods

We measured the rate of production of CSF with the ventriculocisternal perfusion method. This entails the

Table 2. Effects of Halothane on Blood Flow to the Choroid Plexus and Other Brain Regions

|                                                            | First Control | Second Control | Halothane   |             |             |
|------------------------------------------------------------|---------------|----------------|-------------|-------------|-------------|
|                                                            |               |                | 0.25 MAC    | 0.5 MAC     | 1 MAC       |
| Blood flow (ml · min <sup>-1</sup> · 100 g <sup>-1</sup> ) |               |                |             |             |             |
| Choroid plexus                                             | 351 ± 197     | 348 ± 114      | 346 ± 175   | 311 ± 174   | 321 ± 197   |
| Total brain                                                | 55 ± 18       | 59 ± 13        | 59 ± 15     | 61 ± 19     | 71 ± 9*     |
| Caudate nucleus                                            | 81 ± 27       | 71 ± 27        | 82 ± 35     | 84 ± 48     | 116 ± 61*   |
| Thalamus                                                   | 102 ± 43      | 114 ± 45       | 119 ± 49    | 110 ± 43    | 111 ± 41    |
| Midbrain                                                   | 57 ± 24       | 55 ± 18        | 58 ± 20     | 58 ± 21     | 69 ± 32*    |
| Pons                                                       | 42 ± 12       | 45 ± 10        | 45 ± 9      | 46 ± 16     | 57 ± 12*    |
| Medulla                                                    | 52 ± 14       | 55 ± 14        | 53 ± 13     | 60 ± 23     | 71 ± 32*    |
| Cerebellum                                                 | 60 ± 17       | 63 ± 14        | 61 ± 13     | 69 ± 21     | 84 ± 32*    |
| Mean blood pressure (mmHg)                                 | 95 ± 12       | 95 ± 14        | 83 ± 14*    | 77 ± 18*    | 59 ± 21*    |
| Arterial blood gases                                       |               |                |             |             |             |
| pH                                                         | 7.41 ± 0.03   | 7.40 ± 0.04    | 7.39 ± 0.04 | 7.38 ± 0.03 | 7.34 ± 0.04 |
| P <sub>CO<sub>2</sub></sub> (mmHg)                         | 36 ± 2        | 37 ± 4         | 36 ± 4      | 36 ± 4      | 35 ± 2      |
| P <sub>O<sub>2</sub></sub> (mmHg)                          | 211 ± 83      | 221 ± 96       | 218 ± 95    | 215 ± 90    | 230 ± 68    |

Data belong to animals of group I in the blood flow studies. Values are mean ± SD (n = 9). Brain means all brain tissue down to and including the medulla oblongata (choroid plexus not included). Wet weights were used to calculate blood flows.

\* Significantly different from the second control at  $P < .05$ .

use of a nondiffusible indicator and is used widely in the studies of CSF production.<sup>9,10,14,15,19-21</sup> Determination of the rate of production of CSF with this method is based on the dilution of blue dextran containing artificial CSF by CSF produced in the ventricular system of the brain. The rates of production of CSF in this study were stable after equilibration of the tracer in the time control animals or the animals that received

the V<sub>1</sub> antagonist alone (fig. 1, table 1) and are similar to rates that were reported previously for rabbits.<sup>1,14,15,19-21</sup>

We measured the blood flow to the choroid plexus using radioactive microspheres. Radioactive microspheres have been used to measure blood flow to the choroid plexus in several studies,<sup>4-8,22-28</sup> and this method was validated by Faraci<sup>4</sup> for repeated measure-

Table 3. Effects of Halothane after V<sub>1</sub> Antagonist on Blood Flow to the Choroid Plexus and Other Brain Regions

|                                                            | First Control | V <sub>1</sub> Antagonist | Halothane   |             |              |
|------------------------------------------------------------|---------------|---------------------------|-------------|-------------|--------------|
|                                                            |               |                           | 0.25 MAC    | 0.5 MAC     | 1 MAC        |
| Blood flow (ml · min <sup>-1</sup> · 100 g <sup>-1</sup> ) |               |                           |             |             |              |
| Choroid plexus                                             | 337 ± 135     | 494 ± 229*                | 511 ± 147*  | 454 ± 143*  | 346 ± 126†   |
| Brain                                                      | 60 ± 11       | 55 ± 13                   | 62 ± 8      | 66 ± 11†    | 76 ± 9†      |
| Caudate                                                    | 68 ± 23       | 62 ± 10                   | 63 ± 15     | 69 ± 18     | 81 ± 16†     |
| Thalamus                                                   | 91 ± 25       | 87 ± 28                   | 120 ± 37    | 104 ± 23    | 124 ± 42†    |
| Midbrain                                                   | 59 ± 10       | 54 ± 6                    | 60 ± 6      | 61 ± 4†     | 68 ± 10†     |
| Pons                                                       | 35 ± 7        | 34 ± 9                    | 33 ± 9      | 38 ± 6      | 48 ± 7†      |
| Medulla                                                    | 47 ± 6        | 45 ± 6                    | 46 ± 9      | 51 ± 6      | 69 ± 17†     |
| Cerebellum                                                 | 69 ± 9        | 55 ± 8                    | 60 ± 7      | 64 ± 11†    | 77 ± 13†     |
| Mean blood pressure (mmHg)                                 | 90 ± 8        | 89 ± 11                   | 83 ± 12     | 75 ± 14†    | 69 ± 13†     |
| Arterial blood gases                                       |               |                           |             |             |              |
| pH                                                         | 7.41 ± 0.04   | 7.39 ± 0.04               | 7.39 ± 0.04 | 7.37 ± 0.04 | 7.36 ± 0.04† |
| P <sub>CO<sub>2</sub></sub> (mmHg)                         | 36 ± 4        | 37 ± 4                    | 37 ± 3      | 38 ± 3      | 39 ± 3       |
| P <sub>O<sub>2</sub></sub> (mmHg)                          | 264 ± 202     | 204 ± 51                  | 172 ± 11    | 172 ± 19    | 159 ± 15     |

Data belong to animals of group II in the blood flow studies. Values are mean ± SD (n = 7). Brain means all brain tissue down to and including the medulla oblongata (choroid plexus not included). Wet weights were used to calculate blood flows.

\* Significantly different from first control at  $P < .05$ .

† Significantly different from V<sub>1</sub> antagonist at  $P < .05$ .

## CHOROID PLEXUS AND HALOTHANE

**Table 4. Effects of Hemorrhagic Hypotension on Blood Flow to the Choroid Plexus and the Brain**

|                                                            | First Control | Second Control | Hemorrhagic Hypotension<br>(% change from control) |             |              |
|------------------------------------------------------------|---------------|----------------|----------------------------------------------------|-------------|--------------|
|                                                            |               |                | -10%                                               | -25%        | -50%         |
| Blood flow (ml · min <sup>-1</sup> · 100 g <sup>-1</sup> ) |               |                |                                                    |             |              |
| Choroid plexus                                             | 394 ± 208     | 354 ± 161      | 349 ± 207                                          | 150 ± 84*   | 99 ± 43*     |
| Brain                                                      | 71 ± 18       | 64 ± 17        | 70 ± 23                                            | 64 ± 16     | 62 ± 18      |
| Caudate                                                    | 73 ± 32       | 80 ± 25        | 89 ± 43                                            | 102 ± 22    | 78 ± 23      |
| Thalamus                                                   | 114 ± 101     | 101 ± 35       | 114 ± 45                                           | 107 ± 26    | 97 ± 19      |
| Midbrain                                                   | 71 ± 21       | 68 ± 18        | 69 ± 15                                            | 72 ± 18     | 76 ± 33      |
| Pons                                                       | 46 ± 18       | 38 ± 15        | 38 ± 14                                            | 40 ± 15     | 50 ± 20*     |
| Medulla                                                    | 68 ± 18       | 53 ± 14        | 56 ± 16                                            | 57 ± 21     | 62 ± 23      |
| Cerebellum                                                 | 75 ± 23       | 74 ± 20        | 82 ± 27                                            | 82 ± 20     | 86 ± 36*     |
| Mean blood pressure (mmHg)                                 | 91 ± 10       | 89 ± 10        | 81 ± 8*                                            | 67 ± 9*     | 48 ± 7*      |
| Arterial blood gases                                       |               |                |                                                    |             |              |
| pH                                                         | 7.41 ± 0.05   | 7.42 ± 0.05    | 7.42 ± 0.05                                        | 7.42 ± 0.03 | 7.36 ± 0.06* |
| P <sub>CO<sub>2</sub></sub> (mmHg)                         | 40 ± 1        | 37 ± 3         | 39 ± 3                                             | 37 ± 4      | 35 ± 4       |
| P <sub>O<sub>2</sub></sub> (mmHg)                          | 165 ± 17      | 184 ± 28       | 193 ± 40                                           | 226 ± 47    | 229 ± 102    |

Data belong to animals of group III in the blood flow studies. Values are mean ± SD (n = 8). Brain means all brain tissue down to and including the medulla oblongata (choroid plexus not included). Wet weights were used to calculate blood flows.

\* Significantly different from the second control at  $P < .05$ .

ments. The variability of repeated measurements of the blood flow to the choroid plexus under control conditions was slightly greater than that for the whole brain (11% *vs.* 6%), but despite this somewhat greater variability, the method is sufficiently sensitive to detect changes in blood flow to the choroid plexus in response to vasoactive stimuli.<sup>4-8</sup> Our values of blood flow to the choroid plexus are similar to values reported by other investigators using radioactive microspheres,<sup>22-28</sup> iodoantipyrine with freezing of the tissues,<sup>29</sup> and isopropyl iodoamphetamine.<sup>30</sup>

#### *Volatile Agents and the Choroid Plexus*

Potent volatile agents have important and variable effects on the dynamics of CSF and on intracranial pressure. For example, although halothane decreases CSF production by 30%,<sup>9</sup> enflurane increases the rate of CSF production by approximately 50%,<sup>10</sup> a change that is associated with a gradual increase in intracranial pressure unrelated to any effects on cerebral blood flow. It was suggested previously that the mechanism by which halothane decreases and enflurane increases the rate of production of CSF may be explained by an effect on choroid plexus metabolism, possibly a reduction in the choroid plexus metabolic rate for glucose by halothane and an increase by enflurane.<sup>9</sup>

In this study, halothane decreased CSF production by almost one third (fig. 1, table 1). This is similar to the

value reported by Artru in dogs.<sup>9</sup> However, halothane did not affect the blood flow to the choroid plexus (table 2). We have reported previously that acetazolamide increases choroid plexus blood flow by 140% and decreases CSF production by 55%.<sup>31</sup> This suggests that the effects of acetazolamide and halothane on CSF production were due to effects on the secretory epithelium and were not related to changes in blood flow to the choroid plexus. This contrasts with the observation that norepinephrine, angiotensin II,<sup>32</sup> and vasopressin decrease both blood flow to the choroid plexus<sup>5,6</sup> and CSF production.<sup>6,15</sup> This also is compatible with the hypothesis that blood flow to the choroid plexus sets an upper limit on the levels of CSF production.

As expected, halothane increased total blood flow to the brain (tables 2 and 3). In contrast, it did not affect the blood flow to the choroid plexus (table 2). Since halothane increased plasma levels of vasopressin, the response of choroid plexus blood flow to halothane may be the net result of the constrictor effect of vasopressin and the dilator effect of halothane on vascular smooth muscles of the choroid plexus.

In pilot experiments, we could not prevent decreases in blood pressure during the administration of halothane by infusing hetastarch sodium or blood. The use of intravenous vasopressors, to support the blood pressure during administration of halothane, would not be



appropriate in this study because circulating pressors decrease the blood flow to the choroid plexus<sup>4-8</sup> and the production of CSF.<sup>6,15,32</sup> Therefore, no effort was made to support the blood pressure during the administration of halothane.

#### *Receptor Mechanisms of Vasopressin*

The vasopressin receptors are designated  $V_1$  and  $V_2$ .<sup>33,34</sup> Stimulation of  $V_1$  receptors results in contraction of vascular smooth muscle, whereas  $V_2$  receptors influence epithelial functions such as changes in water permeability in the collecting tubules of the kidney.<sup>33,34</sup> However, the choroid plexus has a relatively high density of  $V_1$  receptors and apparently no  $V_2$  receptors,<sup>12,13</sup> with fluid secretion in the choroid plexus being mediated through a  $V_1$  mechanism. This is supported by the observation that during vasopressin infusion, the  $V_1$  antagonist prevented both the decrease in blood flow to the choroid plexus and the decrease in CSF production (plasma levels of vasopressin were 55 and  $\sim 350$  pg/ml<sup>5,6</sup> respectively). The specificity of this antagonist for  $V_1$  receptors has been established in various preparations and vascular beds,<sup>35-38</sup> including cerebral vessels.<sup>37</sup> We previously have examined the specificity of the  $V_1$  antagonist in the choroid plexus and demonstrated that the  $V_1$  receptor blocker prevented the constrictor effect of vasopressin whereas the constrictor effect of phenylephrine was preserved.<sup>5</sup>

In this study, the  $V_1$  antagonist prevented the decrease in CSF production due to halothane (fig. 1, table 1) without either affecting the associated decrease in blood pressure (tables 1 and 3) or altering CSF production by itself (fig. 1, table 1). Despite the fact that blood pressure during hemorrhage and administration of halothane was similar, hemorrhage resulted in a greater decrease in CSF production. Furthermore, the influence of the  $V_1$  antagonist on the decrease in CSF production during hemorrhage, albeit statistically significant, was modest. These findings suggest that a vasopressin-related mechanism but not the decrease in blood pressure *per se*, may account for the reduction in CSF production by halothane. However, we cannot exclude the possibility that this phenomenon is further mediated by a direct effect of halothane on the choroidal epithelium.

The  $V_1$  antagonist did not completely block the effects of hemorrhagic hypotension on CSF production. This may be because the administration of the  $V_1$  antagonist during hemorrhage blocks only effects of vasopressin on CSF production, without altering the influence of

the sympathetic nervous system and the renin-angiotensin system.<sup>32,39</sup>

#### *Effect of Hemorrhagic Hypotension*

During hemorrhagic hypotension, total blood flow to the brain did not change significantly from control values (table 4) indicating that cerebral autoregulation was preserved. Our findings are similar to previously published reports that measured blood flow to the brain in rabbits<sup>23,24</sup> using radioactive microspheres. Effects of hemorrhage on cerebral blood flow also were examined in dogs with the microsphere technique<sup>40,41</sup> and more recently with the venous outflow method.<sup>42</sup> Blood flow to the brain was not maintained when cerebral perfusion pressure was decreased to  $\sim 45$ – $55$  mmHg. The use of different anesthetics and different species might have contributed to the difference between our results and the previous results in dogs.

Blood flow to the choroid plexus decreased drastically during hemorrhage in this study (table 4). Previous studies also reported large decreases in blood flow to the choroid plexus<sup>23-25</sup> and in CSF production<sup>21,43</sup> during hemorrhage. This suggests that, during hemorrhagic hypotension, circulating humoral stimuli readily reach vascular smooth muscles, and perhaps the secretory epithelium of the choroid plexus, and exert marked effects on blood flow. This also may suggest lack of autoregulation in blood vessels of the choroid plexus.

#### *Plasma Levels of Vasopressin*

The baseline concentrations of vasopressin produced in this study are within the range of previously reported values (0.3–30 pg/ml).<sup>33,34</sup> However, after the administration of halothane, plasma vasopressin levels were greater than previously reported values during the administration of halothane.<sup>11-14</sup> Animals of the blood flow studies received chloralose and underwent surgical preparation to insert the various intravascular catheters. Thus, it is possible that surgery and/or chloralose potentiated the release of vasopressin by halothane. Our data show large variability under the same conditions from one response to the other. This is consistent with vasopressin levels seen during hypotension in a variety of species.<sup>45-49</sup> The cause of this large variability is not clear.

In conclusion, we have confirmed in rabbits the previous findings in dogs that halothane decreases rate of production of CSF. Our findings suggest dissociation between blood flow to the choroid plexus and rate of production of CSF during halothane anesthesia and are

## CHOROID PLEXUS AND HALOTHANE

consistent with the hypothesis that halothane decreases the rate of production of CSF through a vasopressin-related mechanism.

Dr. F. M. Faraci is an Established Investigator of the American Heart Association. We thank Dr. Gary Sneyder and Donna Farley for measurement of plasma vasopressin concentrations. We also thank Dr. Donald Heistad for his critical review of this manuscript and Gail Stackovic for technical assistance. Finally, we wish to thank Dr. John Tinker, Head of the Department of Anesthesia at the University of Iowa, for his continued support.

## References

1. Davson H, Welch K, Segal MB: The Physiology and Pathophysiology of the Cerebrospinal Fluid. New York, Churchill Livingstone, 1987
2. Brightman MW, Reese TS: Junctions between intimately apposed cell membranes in the vertebrate brain. *J Cell Biol* 40:648-677, 1969
3. Rapoport SI: Blood-Brain Barrier in Physiology and Medicine. New York, Raven, 1976
4. Faraci FM, Mayhan WG, Williams JK, Heistad DD: Effects of vasoactive stimuli on the blood flow to the choroid plexus. *Am J Physiol* 254(Heart Circ Physiol 23):H286-H291, 1988
5. Faraci FM, Mayhan WG, Farrel WJ, Heistad DD: Humoral regulation of blood flow to the choroid plexus: Role of arginine vasopressin. *Circ Res* 63:373-379, 1988
6. Faraci FM, Mayhan WG, Heistad DD: Effect of vasopressin on production of cerebrospinal fluid: Possible role of vasopressin ( $V_1$ ) receptors. *Am J Physiol* 258(Regulatory Integrative Comp Physiol 27):R94-R98, 1990
7. Maktabi MA, Heistad DD, Faraci FM: Effects of angiotensin II on the blood flow to the choroid plexus. *Am J Physiol* 258(Heart Circ Physiol 27):H414-H418, 1990
8. Maktabi MA, Heistad DD, Faraci FM: Effects of central and intravascular angiotensin I and II on the choroid plexus. *Am J Physiol* 261(Regulatory Integrative Comp Physiol 30):R1126-R1132, 1991
9. Artru AA: Effect of halothane and fentanyl on the rate of CSF production in dogs. *Anesth Analg* 62:581-585, 1983
10. Artru AA, Nugent M, Michenfelder JD: Enflurane causes a prolonged and reversible increase in the rate of CSF production in the dog. *ANESTHESIOLOGY* 57:255-260, 1982
11. Simon-Oppermann C, Gray D, Szccepanka-Sadowska, Simon E: Vasopressin in blood and third ventricle CSF of dogs in chronic experiments. *Am J Physiol* 245:R541-R548, 1983
12. Tribollet E, Barberis C, Jard S, Dubois-Dauphin M, Dreifuss J: Localization and pharmacological characterization of high affinity binding sites for vasopressin and oxytocin in the rat brain by light microscopy autoradiography. *Brain Res* 442:105-118, 1988
13. Van Leeuwen FW, Van Der Beek EM, Van Heerikhuizen JJ, Wolters P, Van Der Meulen G, Wan Y-P: Quantitative light microscopic autoradiographic localization of binding sites labelled with [ $^3$ H]-vasopressin antagonist d(CH $_2$ ) $_5$ Tyr(Me)AVP in the rat brain, pituitary, and kidney. *Neurosci Lett* 80:121-126, 1987
14. Davson H, Segal MB: The effects of some inhibitors and accelerating of sodium transport on the turnover of  $^{22}$ Na in the cerebrospinal fluid and the brain. *J Physiol (Lond)* 209:131-153, 1970
15. Lindvall M, Edvinsson L, Owman C: Effect of sympathomimetic drugs and corresponding receptor antagonists on the rate of cerebrospinal fluid production. *Exp Neurol* 64:132-145, 1979
16. Sadoshima S, Thames M, Heistad DD: Cerebral blood flow during elevation of intracranial pressure: Role of sympathetic nerves. *Am J Physiol* 241(Heart Circ Physiol 10):H78-H74, 1981
17. Drummond JC: MAC for halothane, enflurane, and isoflurane in the New Zealand White rabbit: And a test for the validity of MAC determinations. *ANESTHESIOLOGY* 62:336-338, 1985
18. Matsugushi H, Schmid PG, Van Orden D, Mark AL: Does vasopressin contribute to salt-induced hypertension in the Dahl strain. *Hypertension* 3:174-181, 1981
19. Artru AA, Hornbein TF: Closed ventriculocisternal perfusion to determine CSF production rate and pressure. *Am J Physiol* 251(Regulatory Integrative Comp Physiol 20):R996-R999, 1986
20. Lindvall-Axelsson M, Mathew C, Nilsson C, Owman C: Effect of 5-hydroxytryptamine on the rate of cerebrospinal fluid production in the rabbit. *Exp Neurol* 99:362-368, 1988
21. Shapira Y, Artru AA, Lam AM: Changes in the rate of formation and resistance to reabsorption of cerebrospinal fluid during deliberate hypotension induced with adenosine or hemorrhage. *ANESTHESIOLOGY* 76:432-439, 1992
22. Alm A, Bill AL: The effect of stimulation of the cervical sympathetic chain on retinal oxygen tension and on uveal, retinal and cerebral blood flow in cats. *Acta Physiol Scand* 88:84-94, 1973
23. Linder J: Effect of facial nerve section and stimulation on cerebral and ocular blood flow in hemorrhagic hypotension. *Acta Physiol Scand* 112:185-193, 1981
24. Linder J: Effects of cervical sympathetic stimulation on cerebral and ocular blood flows during hemorrhagic hypotension and moderate hypoxia. *Acta Physiol Scand* 114:379-386, 1982
25. Page RB, Fusch DJ, Brennan RW, Hernandez MJ: Choroid plexus blood flow in the sheep. *Brain Res* 197:532-537, 1980
26. Haywood JR, Vogh BP: Some measurements of autonomic nervous system influence on production of cerebrospinal fluid in the cat. *J Pharmacol Exp Ther* 208:341-346, 1979
27. Townsend JB, Zeidonis DM, Bryan RM, Brennan RW, Page RB: Choroid plexus blood flow: Evidence of dopaminergic influence. *Brain Res* 290:165-169, 1984
28. Wagerle LC, Delivoria-Papadopoulos M:  $\alpha$ -Adrenergic receptor subtypes in the cerebral circulation of newborn piglets. *Am J Physiol* 252(Regulatory Integrative Comp Physiol 21):R1092-R1098, 1987
29. Williams JL, Jones SC, Page RB, Bryan RM: Vascular responses of the choroid plexus during hypercapnea in rats. *Am J Physiol* 260(Regulatory Integrative Comp Physiol 29):R1066-R1070, 1991
30. Williams JL, Shea M, Furlan AJ, Little JR, Jones SC: Importance of freezing time when iodoantipyrine is used for measurement of cerebral blood flow. *Am J Physiol* 261(Heart Circ Physiol 30):H252-H256, 1991
31. Faraci FM, Mayhan WG, Heistad DD: Vascular effects of acetazolamide on the choroid plexus. *J Pharmacol Exp Ther* 231:502-511, 1990
32. Maktabi MA, Stachovic GC, Faraci FM: Angiotensin II decreases the rate of production of cerebrospinal fluid. *Brain Res (in press)*
33. Cowley AW, Liard JF, Ausiello DA: Vasopressin: Cellular and Integrative Functions. New York, Raven, 1988, p 513
34. Cowley AW, Liard JF: Cardiovascular actions of vasopressin, Vasopressin. Edited by Gash DM, Boer GJ. New York, Plenum, 1987, pp 389-433
35. Liard JF: Cardiovascular effects associated with antidiuretic

activity of vasopressin after blockade of its vasoconstrictor action in dehydrated dogs. *Circ Res* 58:631-640, 1986

36. Kruszynski M, Lammek B, Manning M: [1-( $\beta$ -mercapto- $\beta$ , $\beta$ -cyclopentamethylenepropionic acid), 2-(O-methyl tyrosine) arginine-vasopressin and [1-( $\beta$ -mercapto- $\beta$ , $\beta$ -cyclopentamethylenepropionic acid)] arginine-vasopressin, two highly potent antagonists of the vasopressor response to arginine-vasopressin. *J Med Chem* 23:364-368, 1980

37. Katusic ZC, Shepherd JT, Vanhoutte PM: Oxytocin causes endothelium-dependent relaxation of canine basilar arteries by activating  $V_1$ -vasopressinergic receptors. *J Pharmacol Exp Ther* 236:166-170, 1986

38. Manning M, Sawyer WH: Design of potent selective in vivo antagonists of the neurohypophysial peptides, *The Neurohypophysis: Structure, Function and Control, Progress in Brain Research*, vol 60. New York, Elsevier, 1983, pp 367-381

39. Szmydynger-Chodobska J, Chodobski A, Palm DE, Johanson CE: Effect of angiotensin II on CSF formation and Cl transport in the choroid plexus of the rat (abstract). *FASEB J* 6:A1775, 1992

40. Marcus ML, Heistad DD: Effect of sympathetic nerves on cerebral blood flow in awake dogs. *Am J Physiol* 236(4):H549-H553, 1979

41. Mueller SM, Heistad DD, Marcus ML: Total and regional cerebral blood flow during hypotension, hypertension, and hypercapnia:

Effect of sympathetic denervation in dogs. *Circ Res* 41:3350-3356, 1977

42. Artru AA, Katz RA, Colley PS: Autoregulation of cerebral blood flow during normocapnia and hypocapnia in dogs. *ANESTHESIOLOGY* 70:288-292, 1989

43. Carey ME, Vela AR: Effects of systemic arterial hypotension on the rate of cerebrospinal fluid production in dogs. *J Neurosurg* 41:350-355, 1974

44. Wu W-H, Zbuzek VK, Bellevue C: Vasopressin release during cardiac operation. *J Thoracic Cardiovasc Surg* 79:83-89, 1980

45. Arnould E, Czernichow P, Fumoux F, Vincent J-D: The effects of hypotension and hypovolemia on the liberation of vasopressin during hemorrhage in the unanesthetized monkey (*Macaca Mulatta*). *Pflügers Arch* 371:193-200, 1977

46. Henry JP, Gupta PD, Meehan JP, Sinclair R, Share L: The role of afferents from the low-pressure system in the release of antidiuretic hormone during non-hypotensive hemorrhage. *Can J Physiol Pharmacol* 46:287-295, 1968

47. Saito T, Yoshida S: Levels of antidiuretic hormone in plasma after hemorrhage and infusion of hypertonic saline in dogs. *Endocrinology* 88:1511-1513, 1971

48. Chien S, Usami S: Rate and mechanism of release of antidiuretic hormone after hemorrhage. *Am J Physiol* 224:519-523, 1973

49. Goetz KL, Bond GC, Bloxham DD: Atrial receptors and receptors and renal functions. *Physiol Rev* 55:157-205, 1975
